# Supplementary material for: Factors related to Internet and game addiction among adolescents: A scoping review
Source: PubMed Central journal article supplement — Belitung Nurs J. 2021 Apr 29;7(2):62–71. doi: 10.33546/bnj.1192 (PMC10353650; doi:10.33546/bnj.1192), 2021-04-29
Supplement: BNJ-7-2-62-s001.pdf [file BNJ-7-2-62-s001.pdf]

## Supplementary File

### Characteristics of Included articles

| No | Author / Country                                                                               | Objective                                                                                                                                               | Theoretical Framework                         | Attributes/Dimensions                                                                                                                                                                            | Antecedents                                                                                                                                                                                                                                                                                                                         | Scale to measure DV                                                                                                                     | Study Design/ Sample                                                               | Score  |
|----|------------------------------------------------------------------------------------------------|---------------------------------------------------------------------------------------------------------------------------------------------------------|-----------------------------------------------|--------------------------------------------------------------------------------------------------------------------------------------------------------------------------------------------------|-------------------------------------------------------------------------------------------------------------------------------------------------------------------------------------------------------------------------------------------------------------------------------------------------------------------------------------|-----------------------------------------------------------------------------------------------------------------------------------------|------------------------------------------------------------------------------------|--------|
| 1  | (Vukosavljevic-Gvozden et al., 2015)<br><br>Serbia                                             | To confirm the mediating role of psychopathological symptoms between irrational beliefs and internet gaming addiction.                                  | Cognitive-Behavioral Therapeutic Perspective. | Frequency of certain thoughts, feelings, and behaviors associated with online gaming in the last six months.                                                                                     | Psychopathology factors include somatization, interpersonal sensitivity, obsessive-compulsive, phobic anxiety, depression, anxiety, hostility, paranoid ideation, and psychoticism. Those factors are considered as an indirect factor of irrational beliefs and a direct factor of online game addiction.                          | Game Addiction Scale (GAS) (Lemmens et al., 2009).<br><br>Cronbach's alpha .92.                                                         | A correlational, cross sectional study ( $n = 219$ )<br><br>Sampling: Not Reported | Medium |
| 2  | (Müller et al., 2015)<br><br>Germany, Greece, Iceland, The Netherlands, Poland, Romania, Spain | To determine the association between socio-demographic factors and psychopathological factors with internet gaming disorder among European adolescents. | Literature review                             | Internet gaming disorder following Diagnostic and Statistical Manual of Mental Disorders (5th ed.; DSM-5) (American Psychiatric Association, 2013).                                              | Internet gaming behavior was influenced by the parent's marital status (divorce), the mother with no formal education (not the father's education and employment status), all game genres, gender, age, and country.                                                                                                                | Assessment of Internet and Computer game Addiction—Gaming Module (AICA-S-gaming) (Woelfling et al., 2011).<br><br>Cronbach's alpha .84. | A cross sectional study ( $n = 12,938$ )<br><br>Stratified random sampling         | High   |
| 3  | (Billieux et al., 2015)<br><br>Geneva                                                          | To identify reliable subtypes of problematic online gamers through cluster analysis.                                                                    | Literature review                             | Internet gaming disorder by Diagnostic and Statistical Manual of Mental Disorders (5th ed.; DSM-5) (American Psychiatric Association, 2013).                                                     | Problematic online gamers are influenced by psychological risk factors: impulsivity, self-esteem, motives to play (feeling of achievement, making friends, relief from negative emotion, feeling of excitement, passing time).                                                                                                      | Internet Addiction Test (Khazaal et al., 2008).<br><br>Cronbach's alpha .89.                                                            | A cross sectional survey ( $n = 1,057$ )<br><br>Sampling: Not reported             | Medium |
| 4  | (Walther et al., 2012)<br><br>Germany                                                          | To identify the correlations between personality factors and gambling, substance use, and computer gaming.                                              | Literature review                             | Gaming addiction is nonsubstance-related addiction, focusing on specific behavior, producing short-term rewards, and impact on harmful consequences due to diminished control over the behavior. | Gaming addiction is associated with personality factors, such as social anxiety, impulsivity, ADHD, sensation seeking, extraversion, irritability/aggression, loneliness, social self-efficacy, and self-esteem.<br><br>The other factors of gaming addiction include gender, socio-economic status, parental monitoring, and age.  | The original 14-item Video Game Dependency Scale KFN-CSAS-II (Rehbein et al., 2010).<br><br>Cronbach's alpha .90.                       | A cross sectional survey ( $n = 2,553$ )<br><br>Sampling: Not reported             | Medium |
| 5  | (Chen et al., 2015)<br><br>Taiwan                                                              | To determine factors related to Internet addiction among elementary and junior high school students in Taiwan                                           | Literature review                             | Four components of internet addiction: a loss of the sense of time or a neglect of basic drives; withdrawal behaviors; tolerant behavior, and negative repercussions.                            | Factors correlated with internet addiction: male, low-income family support, protective parenting, poor academic performance, autistic traits, impaired social adjustment, ADHD-related symptoms.                                                                                                                                   | The Chen Internet Addiction Scale (CIAS) (Chen et al., 2003)<br><br>Cronbach's alpha .90.                                               | A questionnaire-based survey ( $n = 1,153$ )<br><br>Sampling: Not reported         | Medium |
| 6  | (Porter et al., 2010)<br><br>Australia                                                         | To identify the problem of video game use and its related variables.                                                                                    | Literature review                             | Excessive use of one or more video games, which leads to preoccupation, a loss of control, and other negative psychosocial and/or physical consequences.                                         | Easier to meet new people online. Having fewer friends in real life is a factor of video game use problems.                                                                                                                                                                                                                         | A 33-item video game use questionnaire (VGUQ) (Porter et al., 2010)<br><br>Validity and reliability: not reported                       | A cross sectional survey ( $n = 1,945$ )<br><br>Sampling: Not reported             | Medium |
| 7  | (Frangos et al., 2011)<br><br>Greece                                                           | To examine the correlation between Problematic Internet Use (PIU) and its related factors among university students in Greece.                          | Literature review                             | Excessive, problematic, or maladaptive internet use                                                                                                                                              | Factors associated with PIU: gender, the grade of studies during the previous semester, parental family status, staying or not with parents, subscription to the Internet, and enrollment of the student in an unemployment program.<br><br>Other associated factors include smoking, drinking alcohol or coffee, and taking drugs. | Self-development: Problematic Internet Use Diagnostic Test (PIUDT) with confirmatory factor analysis with a satisfactory model.         | A cross sectional study ( $n = 2,358$ )<br><br>Sampling: Not reported              | Medium |

|    |                                                                                                  |                                                                                                                                            |                                                                                                      |                                                                                                                                                                                |                                                                                                                                                                                                                                                                                                                                                                                                                                                                                      |                                                                                                                                     |                                                                                                     |        |
|----|--------------------------------------------------------------------------------------------------|--------------------------------------------------------------------------------------------------------------------------------------------|------------------------------------------------------------------------------------------------------|--------------------------------------------------------------------------------------------------------------------------------------------------------------------------------|--------------------------------------------------------------------------------------------------------------------------------------------------------------------------------------------------------------------------------------------------------------------------------------------------------------------------------------------------------------------------------------------------------------------------------------------------------------------------------------|-------------------------------------------------------------------------------------------------------------------------------------|-----------------------------------------------------------------------------------------------------|--------|
| 8  | (Smith et al., 2015)<br>Australia                                                                | To identify video gaming hours and its related factors                                                                                     | Literature review                                                                                    | Not clearly described                                                                                                                                                          | Ownership of adolescents' devices, location (i.e., bedroom), and parents discussing cybersafety are associated with video game play.                                                                                                                                                                                                                                                                                                                                                 | 7-item questionnaire "What Parents Say and Do" (WPSAD) (King et al., 2015)<br>Cronbach's alpha .61.                                 | A correlational study (n = 422)<br>Sampling: Not reported                                           | Medium |
| 9  | (Toker & Baturay, 2016)<br>Turkey                                                                | To identify antecedents and consequences of game addiction                                                                                 | Literature review                                                                                    | The activity cannot be described as addiction of there is no negative consequence in the gamer's life, although the gamer is playing 14 hours a day.                           | The antecedents of game addiction are socioeconomic status, mother's employment, mother's educational level smoking, computer-ownership, gender, online and computer gaming.                                                                                                                                                                                                                                                                                                         | Yes/No type questionnaire game addiction (Çakır et al., 2011)<br>Cronbach's alpha .85.                                              | A correlational study (n = 159)<br>Sampling: Not reported                                           | Medium |
| 10 | (Tsitsika et al., 2014)<br>Greece, Spain, Romania, Poland, Germany, The Netherlands, and Iceland | To investigate the correlation between psychosocial characteristics and prevalence of Internet addictive behavior (IAB) among adolescents. | Literature review                                                                                    | Internet addictive behavior is a behavioral pattern characterized by loss of control, leading to isolation and neglect of social, academic, recreational, and personal health. | Influencing factors include frequent use of specific online activities (e.g., gambling, social networking, gaming) at least six days/week, lower educational level of the parents, earlier age at first use of the Internet, greater use of social networking sites and gaming sites, internalizing problems (anxiety, depression, somatic complaints, social problems, thought problems, attention problems), externalizing problems (rule-breaking behavior, aggressive behavior). | Internet Addiction Test (IAT) (Young, 1998)<br>Cronbach's alpha .92.                                                                | A cross sectional school-based survey study (n = 13,284)<br>A clustered probability sampling method | High   |
| 11 | (Kuss et al., 2013)<br>United Kingdom                                                            | To assess the relationship between personality traits and prevalence of potential internet addiction.                                      | Literature review                                                                                    | Addiction is defined based on the Diagnostic and Statistical Manual of Mental Disorders (5th ed.; DSM-5) (American Psychiatric Association, 2013).                             | Internet addiction is associated with the use of online gaming and social applications and personality traits.                                                                                                                                                                                                                                                                                                                                                                       | The compulsive internet use scale (CIUS) (Meerkerk et al., 2009)<br>Cronbach's alpha .88.                                           | A monitor study (n = 3,105)<br>A stratified sampling method                                         | High   |
| 12 | (Xu et al., 2012)<br>China                                                                       | To identify the correlation of motivation, prevention factors, and online game addiction                                                   | Literature review                                                                                    | Game addiction is manifested through six core symptoms: relapse and reinstatement, conflict, withdrawal, and behavioral salience.                                              | There are three groups of factors:<br>1) Motivating factors include the need for advancement, need for relationship, need for mastering a game's mechanics, need for escapism.<br>2) Prevention and harm reduction factors: attention switching, parental monitoring, dissuasion, rationalization/ education, resource restriction, and perceived cost.<br>3) Game playing is considered a mediating variable of those factors.                                                      | Charlton and Danforth's scale (Charlton & Danforth, 2007)<br>Cronbach's alpha .83.                                                  | A paper-based survey (n= 623)<br>A convenience sampling method                                      | Medium |
| 13 | (Hu et al., 2017)<br>China                                                                       | To examine the association between sensation seeking and online gaming addiction in adolescents.                                           | Dual systems model and biosocial-affect model of adolescent sensation seeking and problem behaviors. | Addiction is characterized by being preoccupied with computer games, withdrawal, and escape from the real world.                                                               | Sensation seeking, positive affective associations with online games, and impulsivity were significantly and positively associated with online gaming addiction.<br><br>Affective associations and impulsivity are mediating factors of the correlation between sensation seeking and gaming addiction.                                                                                                                                                                              | Chinese Internet Addiction Scale (CIAS) (Chen et al., 2003)<br>Cronbach's alpha .94.                                                | A correlational study (n = 375)<br>Sampling: Not reported                                           | Medium |
| 14 | (Wang et al., 2014)<br>Hong Kong                                                                 | To investigate factors of video and internet gaming addiction among Hong Kong adolescents                                                  | Literature review                                                                                    | Addiction is defined based on the Diagnostic and Statistical Manual of Mental Disorders (5th ed.; DSM-5) (American Psychiatric Association, 2013).                             | Significant factors of gaming addiction: gender (boys), poor academic performance, perceived family disharmony, finding more friends.                                                                                                                                                                                                                                                                                                                                                | Game Addiction Scale (GAS) (Lemmens et al., 2009)<br>Cronbach's alpha .93.                                                          | A cross-sectional study (n = 503)<br>Random sampling only for school, not for participants.         | Medium |
| 15 | (Milani et al., 2018)<br>Italy                                                                   | To identify risk factors of internet gaming disorder                                                                                       | Literature review                                                                                    | Addiction is defined based on the Diagnostic and Statistical Manual of Mental Disorders (5th ed.; DSM-5) (American Psychiatric Association, 2013).                             | Significant factors of internet gaming disorder are age, gender, IAT (internet addiction test) score, and avoidance coping strategy                                                                                                                                                                                                                                                                                                                                                  | Internet addiction test (Young, 1998)<br>Cronbach's alpha .89.<br><br>Video game addiction (Gentile, 2009)<br>Cronbach's alpha .71. | A cross-sectional study (n = 612)<br>Convenience sampling                                           | Medium |

|    |                                    |                                                                                                         |                   |                                                                                                                                                                                                 |                                                                                                                                                                                                                                                                                                                                                                                                                                                                                                                                          |                                                                                                                                                                               |                                                                       |        |
|----|------------------------------------|---------------------------------------------------------------------------------------------------------|-------------------|-------------------------------------------------------------------------------------------------------------------------------------------------------------------------------------------------|------------------------------------------------------------------------------------------------------------------------------------------------------------------------------------------------------------------------------------------------------------------------------------------------------------------------------------------------------------------------------------------------------------------------------------------------------------------------------------------------------------------------------------------|-------------------------------------------------------------------------------------------------------------------------------------------------------------------------------|-----------------------------------------------------------------------|--------|
| 16 | (Wittek et al., 2016)<br>Norway    | To identify the predictors of video game addiction.                                                     | Literature review | Problematic or pathological use of video games, which leads to functional impairment in daily life.                                                                                             | The predictors of video game addiction are gender (male), age group (young), place of birth (Africa, Asia, South-and Middle America, poor psychosomatic health.<br><br>Video gaming addiction was positively associated with neuroticism and negatively associated with conscientiousness.                                                                                                                                                                                                                                               | Game addiction scale (Lemmens et al., 2009)<br><br>Cronbach's alpha .84.                                                                                                      | A cross-sectional study (n = 3,389).<br><br>Random sampling           | Medium |
| 17 | (Vollmer et al., 2014)<br>Turkey   | To identify the computer game addiction and its relationship with personality and chronotype.           | Literature review | Addiction is defined based on the Diagnostic and Statistical Manual of Mental Disorders (5th ed.; DSM-5) (American Psychiatric Association, 2013).                                              | Significant factors of gaming addiction: gender (males), age (young), chronotype (evening type), usage time, and Big 5 personality.                                                                                                                                                                                                                                                                                                                                                                                                      | Computer game addiction scale (CGA) (Ayas et al., 2011)<br><br>Cronbach's alpha .92.                                                                                          | A cross-sectional survey (n = 741)<br><br>Convenience sampling method | Medium |
| 18 | (Gunuc, 2017)<br>Turkey            | To determine if the peer influences the internet and digital game addiction                             | Literature review | Addiction is defined based on the Diagnostic and Statistical Manual of Mental Disorders (5th ed.; DSM-5) (American Psychiatric Association, 2013).                                              | Peer influence is the essential factor of the Internet and digital game addictions.                                                                                                                                                                                                                                                                                                                                                                                                                                                      | Digital game addiction questionnaire (DGAQ) – Self-development.<br>Cronbach's alpha .71.<br><br>Internet Addiction scale (IAS) (Günüç & Kayrı, 2010)<br>Cronbach's alpha .94. | A correlational study (n = 184)<br><br>Purposive sampling             | Medium |
| 19 | (Pawlowska et al., 2018)<br>Poland | To determine the correlation between demographic and family-related factors and online gaming addiction | Literature review | Addiction is defined based on the Diagnostic and Statistical Manual of Mental Disorders (5th ed.; DSM-5) (American Psychiatric Association, 2013)                                               | Major predictors of online gaming addiction included male gender, urban residence, domestic violence, mother's child-raising rules being challenged by the father, and the child's sense of responsibility for his/her parents.                                                                                                                                                                                                                                                                                                          | Online gaming addiction questionnaire (Potembska & Pawlowska, 2014).<br><br>Validity and reliability: not reported                                                            | A correlational study (n = 827)<br><br>Sampling: Not reported         | Medium |
| 20 | (Wong & Lam, 2016)<br>Hong Kong    | To investigate adolescent gaming behavior and addiction in Hong Kong teenagers                          | Literature review | Addiction is defined based on the Diagnostic and Statistical Manual of Mental Disorders (5th ed.; DSM-5) (American Psychiatric Association, 2013)                                               | Psychological risk factors of gaming addiction: low self-esteem, seeking aggressive and exciting experiences, killing time and obtaining satisfaction, coping with problems and negative emotions, obsession with achieving higher status or rankings.<br><br>Environmental and social factors of gaming addiction: accessibility to internet cafes, aggressive promotional activities, peer pressure, family influence and early gaming, perceived parental approval, lack of parental supervision, and low-income family relationship. | Researchers themselves                                                                                                                                                        | A qualitative study (n=13)<br><br>Convenience sampling                | Medium |
| 21 | (Bekir & Çelik, 2019)<br>Turkey    | To examine factors contributing to adolescents' online game addiction                                   | Literature review | Online gaming addiction is a sub-branch of internet addiction.                                                                                                                                  | Sensation seeking and basic psychological needs (need for autonomy, competence, and relatedness) are related to online gaming addiction.                                                                                                                                                                                                                                                                                                                                                                                                 | Online game addiction scale (OGAS) (Kaya, 2013)<br>Cronbach's alpha .91.                                                                                                      | A correlational study (n=214)<br><br>Criterion sampling method        | Medium |
| 22 | (Shek & Yu, 2016)<br>Hong Kong     | To identify the prevalence, change, and correlates of internet addiction in adolescent                  | Literature review | Intense preoccupation with using the Internet, excessive amounts of time spent online, feeling that the world without the Internet is boring, and decreased social interaction with real people | Gender, family economic disadvantage are significant factors of internet addiction. Positive youth development was negatively associated with Internet addiction.                                                                                                                                                                                                                                                                                                                                                                        | The Chinese version of Young's 10-item Internet Addiction Test (IAT) (Shek et al., 2008)<br>Cronbach's alpha .79.                                                             | A longitudinal study (n = 3,498)<br><br>Sampling: Not reported        | Medium |
| 23 | (Moslehpour & Batjargal, 2013)     | To investigate the factors influencing internet addiction                                               | Literature review | Addiction is defined based on the Diagnostic and                                                                                                                                                | Influencing factors of internet addiction are online friends, stress, loneliness, and entertainment                                                                                                                                                                                                                                                                                                                                                                                                                                      | Internet addiction test (Young, 1998).                                                                                                                                        | A cross-sectional study (n= 264)                                      | Medium |

|    |                                                       |                                                                                                                                                            |                   |                                                                                                                                                                                                                                                                                    |                                                                                                                                                                                                                                                                                                                                  |                                                                                                                                  |                                                                        |        |
|----|-------------------------------------------------------|------------------------------------------------------------------------------------------------------------------------------------------------------------|-------------------|------------------------------------------------------------------------------------------------------------------------------------------------------------------------------------------------------------------------------------------------------------------------------------|----------------------------------------------------------------------------------------------------------------------------------------------------------------------------------------------------------------------------------------------------------------------------------------------------------------------------------|----------------------------------------------------------------------------------------------------------------------------------|------------------------------------------------------------------------|--------|
|    | Malaysia & Mongolia                                   | among adolescents of Mongolia and Malaysia                                                                                                                 |                   | Statistical Manual of Mental Disorders (4th ed.; DSM-4)                                                                                                                                                                                                                            |                                                                                                                                                                                                                                                                                                                                  | Reliability: not reported.                                                                                                       | Convenience sampling                                                   |        |
| 24 | (Sul, 2015)<br>Korea                                  | To analyze determinants of Internet game addiction of Korean adolescents                                                                                   | Literature review | Addiction is a phenomenon that affects social and financial life and is related to smoking, gambling, and alcohol, characterized by compulsive obsession, continuous use, and inability to restrain oneself.                                                                       | Determinant factors of addiction: gender, time spending on leisure, participation in family leisure, and leisure satisfaction level.                                                                                                                                                                                             | Youth game addiction scale by the National Youth Policy Institute of South Korea.<br><br>Validity and reliability: not reported. | Survey (n= 3356)<br><br>Stratified multistage cluster sampling         | Medium |
| 25 | (Rho et al., 2016)<br>Korea                           | To identify predictors and patterns of problematic internet game use.                                                                                      | Literature review | Addiction is defined based on the Diagnostic and Statistical Manual of Mental Disorders (5th ed.; DSM-5) (American Psychiatric Association, 2013)                                                                                                                                  | Six important predictors: gaming costs, average weekday gaming time, self-perceptions of addiction to Internet game use, offline Internet gaming community meeting attendance, average weekend and holiday gaming time, and marital status.                                                                                      | Internet addiction Scale by Korea National Information Society Agency.<br><br>Validity and reliability: not reported.            | A cross-sectional study (n=3370).<br><br>Sampling: Not reported        | Medium |
| 26 | (Spilkova et al., 2017)<br>Czech Republic             | To reveal factors of excessive use of social media and excessive online gaming                                                                             | Literature review | Addiction is defined based on the Diagnostic and Statistical Manual of Mental Disorders (5th ed.; DSM-5) (American Psychiatric Association, 2013)                                                                                                                                  | Determinant factors include gender, daily smoking, and binge drinking.                                                                                                                                                                                                                                                           | Self-instrument development.<br><br>Cronbach's alpha: .87.                                                                       | A cross-sectional study (n = 4,887)<br><br>Stratified random sampling. | Medium |
| 27 | (King & Delfabbro, 2017)<br>Adelaide, South Australia | To identify the correlation between parent-child relationship and adolescents' Internet gaming problems                                                    | Literature review | Addiction is defined based on the Diagnostic and Statistical Manual of Mental Disorders (5th ed.; DSM-5) (American Psychiatric Association, 2013)                                                                                                                                  | Parent-child relationships have a weak correlate of Internet gaming problems                                                                                                                                                                                                                                                     | The DSM-5 Internet Gaming Disorder (IGD) checklist<br><br>Cronbach's alpha: .78.                                                 | A cross-sectional survey (n=824)<br><br>Random sampling                | High   |
| 28 | (Kwak et al., 2018)<br>South Korea                    | To determine the correlation between adolescents' smartphone addiction and relationship with parents, peers, and teachers                                  | Literature review | Addictive use or excessive reliance on smartphones are signs of depression, anxiety, aggressiveness, intimidation, a deficit of attention, and a negative self-concept                                                                                                             | Parental neglect was significantly associated with adolescents' smartphone addiction. The relational maladjustment with peers negatively influenced smartphone addiction.                                                                                                                                                        | Internet addiction test (Young, 1998)<br><br>Cronbach's alpha: .92.                                                              | A cross-sectional study (n=2182)<br><br>Purposive sampling             | Medium |
| 29 | (Jeong et al., 2015)<br>South Korea                   | To examine the relationship between the big five personality traits and game addiction                                                                     | Literature review | Excessive use of Internet services as to lose controlling ability in social relationship and daily works. The addictive symptoms include withdrawal, tolerance, salience, and dependence, resulting in pathological addictions such as alcoholics, gambling, and material addicts. | Neuroticism increases game addiction with no effect of extraversion on the addiction.<br><br>General self-efficacy negatively affected game addiction, whereas game self-efficacy increased the degree of game addiction.<br><br>Loneliness enhanced game addiction, while depression showed a negative effect on the addiction. | Revised Internet addiction test (Young, 1998)<br><br>Cronbach's alpha: .91.                                                      | A cross-sectional survey (n=789)<br><br>Random sampling                | Medium |
| 30 | (Laconi et al., 2017)<br>France                       | To explore the relationships between internet gaming disorder, time spent on the internet, gaming time and gaming motives, game genre, and psychopathology | Literature review | Addiction is defined based on the Diagnostic and Statistical Manual of Mental Disorders (5th ed.; DSM-5) (American Psychiatric Association, 2013)                                                                                                                                  | Time spent on the internet, gaming motives and depressive symptoms were significant predictors of Internet gaming disorder                                                                                                                                                                                                       | The Internet Gaming Disorder test-10 (IGDT-10) (Király et al., 2017)<br><br>Reliability: not reported.                           | A cross-sectional study (n=418)<br><br>Sampling: Not reported          | Medium |

|    |                                              |                                                                                                                                                                         |                                                                                        |                                                                                                                                                                          |                                                                                                                                                                                                                                                                                                                     |                                                                                                     |                                                                                          |        |
|----|----------------------------------------------|-------------------------------------------------------------------------------------------------------------------------------------------------------------------------|----------------------------------------------------------------------------------------|--------------------------------------------------------------------------------------------------------------------------------------------------------------------------|---------------------------------------------------------------------------------------------------------------------------------------------------------------------------------------------------------------------------------------------------------------------------------------------------------------------|-----------------------------------------------------------------------------------------------------|------------------------------------------------------------------------------------------|--------|
| 31 | (Torres-Rodríguez et al., 2018)<br>Barcelona | To examine the psychological characteristics of treatment-seeking adolescents with gaming disorder                                                                      | Literature review                                                                      | Addiction is defined based on the Diagnostic and Statistical Manual of Mental Disorders (5th ed.; DSM-5) (American Psychiatric Association, 2013)                        | Several personality traits were found to be highly associated with internet gaming disorder, including introversion, inhibition, self-devaluation, interpersonal sensibility, submissiveness, phobic anxiety, obsessive-compulsive tendencies, and hostility, as well as paranoid and borderline personality traits | Internet Gaming Disorder Test (IGD-20 Test) (Fuster et al., 2016)<br><br>Reliability: not reported. | A cross-sectional study (n=55)<br><br>Sampling: Not reported                             | Medium |
| 32 | (Stavropoulos et al., 2016)<br>Greece        | To examine the role of conscientiousness (as a personality trait) and classroom hostility (as a contextual factor) in the development of Internet Addiction             | Literature review                                                                      | Addiction is defined based on the Diagnostic and Statistical Manual of Mental Disorders (5th ed.; DSM-5) (American Psychiatric Association, 2013).                       | Lower conscientiousness was associated with IA, and this did not change over time                                                                                                                                                                                                                                   | Internet addiction test (Young, 1998)<br><br>Cronbach's alpha: .93.                                 | A longitudinal study (n=648)<br><br>Randomized stratified sampling                       | High   |
| 33 | (Bianchini et al., 2017)<br>Italia           | To examine the prevalence of internet addiction and its associated factors in Italian students                                                                          | Literature review                                                                      | Pathological and compulsive use of the internet with the presence of factors such as withdrawal syndrome, tolerance, impulsive usage, and inability to control the usage | Only age was associated with internet addiction.                                                                                                                                                                                                                                                                    | Internet addiction test (Young, 1998)<br><br>Reliability: Not reported                              | Observational study (n= 1,129)<br><br>Sampling: Not reported                             | Medium |
| 34 | (Choo et al., 2015)<br>Singapore             | To examine the main effects of parent-child closeness and parental restriction of child video-gaming on children and adolescents' pathological symptoms of video-gaming | Literature review                                                                      | Addiction is defined based on the Diagnostic and Statistical Manual of Mental Disorders (5th ed.; DSM-5)                                                                 | Predictors of adolescents' pathological symptoms of video-gaming are parent-child bond and gender                                                                                                                                                                                                                   | A 10-item screening instrument derived from the pathological gambling items of the DSM-IV.          | A two-wave longitudinal study (n= 2974)<br>Convenience sampling                          | Medium |
| 35 | (Peeters et al., 2018)<br>Holland            | To identify predictors of internet gaming disorder symptoms in young adolescents                                                                                        | Theoretical mechanism (social vulnerability, life dissatisfaction, attention problems) | Addiction is defined based on the Diagnostic and Statistical Manual of Mental Disorders (5th ed.; DSM-5)                                                                 | Social vulnerability, life dissatisfaction, attention problems were predictors of internet gaming disorder symptoms                                                                                                                                                                                                 | Internet gaming disorder scale (Lemmens et al., 2015)<br>Cronbach's alpha: .77.                     | A longitudinal study (n=354)<br><br>Sampling: Not reported                               | Medium |
| 36 | (Karaca et al., 2020)<br>Istanbul            | To investigate the online game addiction (OGA) level and the risk factors involved in OGA among middle school students                                                  | Literature review                                                                      | Addiction is defined based on the Diagnostic and Statistical Manual of Mental Disorders (5th ed.; DSM-5)                                                                 | Risk factors for online game addiction are older age, a higher level of social anxiety (SA), having parents who completed high school or a higher level of education, having a mother who is employed, and the time spent on the computer                                                                           | Computer Game Addiction Scale for Children (CGASC) (Horzum et al., 2016)<br>Cronbach's alpha: .90.  | A cross-sectional study (n=1174)<br><br>Random sampling                                  | Medium |
| 37 | (Samarein et al., 2013)<br>Iran              | To identify the relationship between personality traits and Internet addiction disorder among adolescents and young adults.                                             | Literature review                                                                      | Addiction is defined based on the Diagnostic and Statistical Manual of Mental Disorders (4th ed.; DSM-4)                                                                 | Internet addiction is significantly positively correlated to neuroticism and negatively correlated to extraversion, agreeableness, and conscientiousness.<br><br>Males scored significantly higher on Internet addiction as compared to females.                                                                    | Internet addiction test (Young, 1998)<br><br>Cronbach's alpha: .82.                                 | A correlational study (n= 400)<br><br>Stratified sampling                                | Medium |
| 38 | (Lim & Nam, 2018)<br>Korea                   | To identify the relationships between problematic Internet use (PIU) and Internet use and psychological functioning variables                                           | Literature review                                                                      | Addiction is defined based on the Diagnostic and Statistical Manual of Mental Disorders (5th ed.; DSM-5)                                                                 | Age cohorts were only found in the relationships between PIU and Internet use time and purpose                                                                                                                                                                                                                      | K-scale for children and adolescents.<br>Cronbach's alpha: .92, .83.                                | A national survey. Children (n=1221), Adolescents (n=3671)<br><br>Sampling: Not reported | Medium |
| 39 | (Sun et al., 2015)<br>China                  | To understand the antecedents of mobile game addiction                                                                                                                  | Literature review                                                                      | Users strongly rely on mobile games and cannot help playing mobile games repeatedly in a comparatively long time,                                                        | Perceived visibility and perceived enjoyment are positively associated with the flow, which in turn affects addiction.<br><br>Perceived visibility has a direct effect on addiction.                                                                                                                                | Game addiction scale by Griffiths (1998)<br>Reliability: not reported.                              | A correlational survey (n=234)<br><br>Sampling: Not reported                             | Medium |

|    |                                               |                                                                                                                                                                                        |                    |                                                                                                                                                                                            |                                                                                                                                                                                                                                                                                                                                                                                                                                     |                                                                                                                                                                        |                                                                                  |        |
|----|-----------------------------------------------|----------------------------------------------------------------------------------------------------------------------------------------------------------------------------------------|--------------------|--------------------------------------------------------------------------------------------------------------------------------------------------------------------------------------------|-------------------------------------------------------------------------------------------------------------------------------------------------------------------------------------------------------------------------------------------------------------------------------------------------------------------------------------------------------------------------------------------------------------------------------------|------------------------------------------------------------------------------------------------------------------------------------------------------------------------|----------------------------------------------------------------------------------|--------|
|    |                                               |                                                                                                                                                                                        |                    | which causes physical, mental, and social damage.                                                                                                                                          |                                                                                                                                                                                                                                                                                                                                                                                                                                     |                                                                                                                                                                        |                                                                                  |        |
| 40 | (Tian et al., 2019)<br>China                  | To investigate the relationship between sensation seeking and adolescent Internet gaming addiction, and correlation with peer affiliation and parental knowledge                       | Literature review  | An uncontrollable, excessive, and compulsive use of Internet games                                                                                                                         | The positive association between sensation seeking and adolescent internet gaming addiction was partially mediated by deviant peer affiliation. In addition, this indirect link was significantly moderated by parental knowledge. Specifically, the indirect path from sensation seeking to adolescent internet gaming addiction was stronger for adolescents with low parental knowledge than those with high parental knowledge. | The 11-item IGA questionnaire (Yu et al., 2015) Cronbach's alpha: .83.                                                                                                 | Structural equation model (n= 1293) Random cluster approach                      | Medium |
| 41 | (Kim & Kim, 2017)<br>Korea                    | To identify the relationship between social interaction factors and excessive online game usage                                                                                        | Literature review  | Excessive online game usage                                                                                                                                                                | Social interaction factors are significantly correlated with excessive online game usage and partially moderated by online self-identity.                                                                                                                                                                                                                                                                                           | Excessive Online Game Usage (EOGU) instrument developed with confirmatory factor analysis.                                                                             | A correlational study (n=179)<br>Sampling: Not reported                          | Medium |
| 42 | (Mehroof & Griffiths, 2010)<br>United Kingdom | To examine the relationship between personality traits and online gaming addiction                                                                                                     | Literature review  | Addiction is defined based on the Diagnostic and Statistical Manual of Mental Disorders (5th ed.; DSM-5)                                                                                   | Five traits (neuroticism, sensation seeking, trait anxiety, state anxiety, and aggression) are significantly associated with online gaming addiction.                                                                                                                                                                                                                                                                               | Game Addiction Scale (GAS) (Lemmens et al., 2009). Reliability: not reported.                                                                                          | A cross-sectional study (n=123)<br>Sampling: not reported                        | Medium |
| 43 | (Chang et al., 2014)<br>Taiwan                | To identify predictors of initiation and persistence of internet addiction among adolescents                                                                                           | Literature review  | Preoccupation, uncontrolled impulse, use that is more than intended, tolerance, withdrawal, impairment of control, the devotion of excessive time and effort, and impaired decision-making | Predictors of internet addiction: greater engagement in online activities (i.e., social network website use, online gaming), depression and lower school bonding in grade 10 coupled with an increase in online activities, depression and smoking from grades 10 to 11                                                                                                                                                             | Chen Internet Addiction Scale (Chen et al., 2003) Cronbach's alpha: .94.                                                                                               | A cross-sectional study (n=1602)<br>A probability-proportionate-to-size sampling | High   |
| 44 | (Lee et al., 2017)<br>Korea                   | To identify risk factors for smartphone addiction in Korean adolescents                                                                                                                | Literature review  | Addiction is defined based on the Diagnostic and Statistical Manual of Mental Disorders (5th ed.; DSM-5)                                                                                   | This study demonstrated that the risk factors for smartphone addiction were female, preoccupation, conflict, and use for the ubiquitous trait. The protective factor was use for learning.                                                                                                                                                                                                                                          | Korean Smartphone Addiction Proneness Scale (Kim et al., 2014) Cronbach's alpha: .88.                                                                                  | A cross-sectional study (n=370)<br>Sampling: Not reported.                       |        |
| 45 | (Andreassen et al., 2013)<br>Norway           | To identify the relationships between the five-factor model of personality and behavioral addiction                                                                                    | Personality theory | Excessive and uncontrollable use.                                                                                                                                                          | Neuroticism and extroversion are positively associated with a behavioral addiction. Openness to experience, agreeableness, and conscientiousness are negatively related to behavioral addiction.                                                                                                                                                                                                                                    | Bergen Facebook Addiction Scale (BFAS) (Griffiths, 2005). Cronbach's alpha: .86. Game Addiction Scale for Adolescents (GASA) (Griffiths, 2005). Cronbach's alpha: .83. | A cross-sectional study (n=218)<br>Sampling: Not reported.                       | Medium |
| 46 | (Bonnaire & Phan, 2017)<br>France             | To identify the correlation between parental attitudes, family functioning, and internet gaming disorder                                                                               | Literature review  | Addiction is defined based on the Diagnostic and Statistical Manual of Mental Disorders (5th ed.; DSM-5)                                                                                   | Parental monitoring, conflicts, and family relationships are correlated with internet game disorder                                                                                                                                                                                                                                                                                                                                 | Game addiction scale (Lemmens et al., 2009) Reliability: not reported                                                                                                  | A cross-sectional study (n=434)<br>Sampling: Not reported.                       | Medium |
| 47 | (Choi & Yoo, 2015)<br>Korea                   | To identify the correlation between family types (multicultural/dual-income) and adolescents' online game addiction, delinquency, and online gaming (eSports) participation motivation | Literature review  | Excessive and compulsive use of video games that result in social and/or emotional problems; despite these problems, the gamer is unable to control this excessive use.                    | Adolescents from dual-income families scored significantly higher on all factors related to juvenile delinquency and addiction factors. Adolescents from multicultural families revealed significantly higher scores on an addiction factor, "mood modification". Adolescents in dual-income families were motivated to play online games to pass the time, and                                                                     | Game addiction scale (Lemmens et al., 2009) Cronbach's alpha: .84 (from the previous study).                                                                           | A cross-sectional study (n=246)<br>Purposive sampling                            | Medium |

|    |                                                      |                                                                                                                                                                         |                                                                    |                                                                                                                                                                     |                                                                                                                                                                                                                                                                                                                                                                                                                                                                                                                                                                                                     |                                                                                                                                   |                                                                             |        |
|----|------------------------------------------------------|-------------------------------------------------------------------------------------------------------------------------------------------------------------------------|--------------------------------------------------------------------|---------------------------------------------------------------------------------------------------------------------------------------------------------------------|-----------------------------------------------------------------------------------------------------------------------------------------------------------------------------------------------------------------------------------------------------------------------------------------------------------------------------------------------------------------------------------------------------------------------------------------------------------------------------------------------------------------------------------------------------------------------------------------------------|-----------------------------------------------------------------------------------------------------------------------------------|-----------------------------------------------------------------------------|--------|
|    |                                                      |                                                                                                                                                                         |                                                                    |                                                                                                                                                                     | adolescents in multicultural families play online games to engage in social interaction                                                                                                                                                                                                                                                                                                                                                                                                                                                                                                             |                                                                                                                                   |                                                                             |        |
| 48 | (Charoenwanit & Sumneangsator, 2014)<br><br>Thailand | To identify predictors of game addiction in children and adolescents                                                                                                    | McMaster Model of Family Function of Epstein and colleagues (1980) | An individual compulsively dedicates time and attention to playing the game to the point where daily activities and normal routines are negatively affected         | Self-esteem and family function predict game addiction in children and adolescent                                                                                                                                                                                                                                                                                                                                                                                                                                                                                                                   | Game Addiction Screening Test of Chanwit Pornnoppadon and colleagues (2009)<br>Cronbach's alpha: .90.                             | A cross-sectional study (n=390)<br><br>Sampling: Not reported               | Medium |
| 49 | (Hull et al., 2013)<br><br>USA & UK                  | To analyze whether certain structural characteristics of video games, flow, and global happiness could be predictive of video game addiction.                           | Literature review                                                  | Addiction is characterized by salience, mood modification, tolerance, withdrawal, conflict, and relapse                                                             | The structural characteristics of video games, elements of the flow experience, and general happiness accounted for 49.2% of the total variance in game addiction                                                                                                                                                                                                                                                                                                                                                                                                                                   | Game addiction scale (Lemmens et al., 2009)<br>Reliability is reported from previous studies                                      | A cross-sectional survey (n=110)<br><br>Opportunity sampling                | Medium |
| 50 | (Toker & Baturay, 2016)<br><br>Turkey                | To identify antecedents and consequences of game addiction                                                                                                              | Literature review                                                  | Multiple constructs                                                                                                                                                 | Socio-economic status, gender, online and computer gaming affect game addiction significantly.                                                                                                                                                                                                                                                                                                                                                                                                                                                                                                      | Game addiction scale (Çakir et al., 2011; Horzum et al., 2016)<br>Cronbach's alpha: .86, .95.                                     | A correlational study (n=159)<br><br>Sampling: Not reported                 | Medium |
| 51 | (Lin et al., 2011)<br><br>Taiwan                     | To examine the prevalence of Internet addiction and associated psychosocial risk factors                                                                                | Literature review                                                  | A new unrecognized clinical disorder that greatly affects a user's ability to control his/her online use and causes relationship, occupational, and social problems | More depressive symptoms, higher Internet usage time, higher positive outcome expectancy of Internet use, lower satisfaction with academic performance, lower refusal self-efficacy of Internet use, higher impulsivity, being male, and insecure attachment style were positively correlated with Internet addiction                                                                                                                                                                                                                                                                               | The Chen Internet Addiction Scale—Revision (CIAS-R)<br>Cronbach's alpha: .95.                                                     | A cross-sectional study (n=3,616)<br>Stratified and random cluster sampling | Medium |
| 52 | (Wu, Ko, et al., 2016)<br><br>Taiwan                 | To examine the role of positive outcome expectancy in the relationship between peer/parental influence and Internet gaming addiction (IGA) among adolescents in Taiwan. | Literature review                                                  | Multiple constructs                                                                                                                                                 | The three types of peer influences (positive attitudes toward Internet gaming, frequency of Internet game use, and invitation to play) and positive outcome expectancy were significantly and positively correlated with IGA. Peers' positive attitude or the frequency of peers' Internet game use positively predicted IGA and was fully mediated through positive outcome expectancy of Internet gaming. The frequency of peers' invitation to play Internet games directly and indirectly predicted IGA severity through a partial mediation of positive outcome expectancy of Internet gaming. | Chen Internet Addiction Scale (Chen et al., 2003)<br>The criterion-related validity between each subscale ranged from .70 to .81. | A cross-sectional study (n= 2,104)<br><br>Stratified and clustered sampling | High   |
| 53 | (Ding et al., 2017)<br><br>China                     | To test a moderated mediation model of the family, peer, and individual characteristics on adolescent internet addiction                                                | Ecological model and literature review                             | Inability to control one's use of the internet, which leads to negative consequences in daily life, academic adjustment, mental health, and substance use problems. | Findings indicated that the impact of parental monitoring in internet addiction was partially mediated by deviant peer affiliation; effortful control moderated the first stage of the indirect relationship. For low effortful control adolescents, perceived parental monitoring negatively predicted deviant peer affiliation. Conversely, the indirect path was not significant for high effortful control adolescents.                                                                                                                                                                         | Internet addiction scale (Young, 1998)<br>Cronbach's alpha: .91.                                                                  | A cross-sectional study (n=747)<br><br>Random sampling                      | High   |
| 54 | (Kim et al., 2018)<br><br>Korea                      | To investigate in gender-sensitive manner factors related to at-risk/problematic Internet use (ARPIU)                                                                   | Literature review                                                  | Multiple domains                                                                                                                                                    | Among boys, novelty-seeking, harm avoidance, self-transcendence, and daily time spent gaming statistically predicted ARPIU. Among girls, daily time spent gaming, number of best friends, self-directedness, and cooperation statistically predicted ARPIU.                                                                                                                                                                                                                                                                                                                                         | Young's online Internet Addiction Test (IAT)<br>Cronbach's alpha: .92.                                                            | A cross-sectional study (n=653)<br><br>Random sampling                      | Medium |
| 55 | (Dong et al., 2013)<br><br>China                     | To examine the potential personality predictors of Internet addicts                                                                                                     | Literature review                                                  | Extensive use, limited physical activity, experience physical and mental health problems.                                                                           | Internet addiction was accounted by three independent variables: Neuroticism/Stability, Psychoticism/Socialization, and Lie                                                                                                                                                                                                                                                                                                                                                                                                                                                                         | Internet Addiction Test (IAT) (Young, 1998)<br>Reliability: not reported                                                          | A cross-sectional study (n=917)<br><br>Random sampling                      | Medium |

|    |                                      |                                                                                |                                               |                                                                                                                                                                |                                                                                                                                                                                                                                                                                                                                                                                                                                                     |                                                                                         |                                                                          |        |
|----|--------------------------------------|--------------------------------------------------------------------------------|-----------------------------------------------|----------------------------------------------------------------------------------------------------------------------------------------------------------------|-----------------------------------------------------------------------------------------------------------------------------------------------------------------------------------------------------------------------------------------------------------------------------------------------------------------------------------------------------------------------------------------------------------------------------------------------------|-----------------------------------------------------------------------------------------|--------------------------------------------------------------------------|--------|
| 56 | (Dhir et al., 2015)<br>India         | To predict adolescent internet addiction                                       | Uses and Gratifications theoretical framework | Multiple constructs                                                                                                                                            | Gender (male adolescents), daily internet use, and connecting gratification are the strongest variable.                                                                                                                                                                                                                                                                                                                                             | Young's online Internet Addiction Test (IAT)<br>Cronbach's alpha:.88.                   | A correlational study (n=1914)<br>Random sampling                        | High   |
| 57 | (Li et al., 2014)<br>China           | To examine how parental behavior and self-control influence internet addiction | Literature review                             | Excessive internet use, such as salience, tolerance, and withdrawal symptoms, physical condition, time management, and social functioning                      | Low self-control capacity had a negative correlation with parents' positive support and a positive correlation with the negative control. Internet addiction was explained negatively by parents' positive support and positively by parents' negative control and low individual capacity of self-control.                                                                                                                                         | Chinese Internet Addiction Scale (CIAS) (Chen et al., 2003)<br>Cronbach's alpha:.95.    | A cross-sectional study (n=966)<br>Sampling: Not reported                | Medium |
| 58 | (Rehbein et al., 2010)<br>Germany    | To identify the causes of gaming addiction                                     | Literature review                             | Addiction is defined based on Diagnostic and Statistical Manual of Mental Disorders (5th ed.; DSM-5)                                                           | The data show that 15-year-old video game addicts had already exhibited a number of specific risk factors at the age of 10. Male gender, students from single-parent families, students with low experienced school well-being and with a weaker social integration seem to be particularly at risk.                                                                                                                                                | Video Game Addiction scale (CSAS)<br>Cronbach's alpha:.92.                              | A two-wave longitudinal survey (n=406)<br>Sampling: Not reported         | Medium |
| 59 | (Hyun et al., 2015)<br>Korea         | To identify risk factors of online game addiction                              | Literature review                             | A mental health problem that may impair daily life, academic performance, family relationships, and emotional development                                      | Individual factors (sex and age), cognitive factors (IQ and perseverative errors), psychopathological conditions (ADHD, depression, anxiety, and self-esteem) are associated with online game addiction                                                                                                                                                                                                                                             | Young online gaming addiction scale.<br>Reliability: not reported.                      | A cross-sectional study (n=263)<br>Sampling: not reported                | Medium |
| 60 | (Lee & Kim, 2017)<br>Korea           | To identify predictors of online game addiction                                | Literature review                             | Addiction is defined based on Diagnostic and Statistical Manual of Mental Disorders (5th ed.; DSM-5)                                                           | Online game playing time was an important predictor of game addiction, especially among those who played PC online games late at night. Among the game genres, RPG, simulation, and casual games were positively associated with addictive behavior. While play and the leisure environment had little effect on game addiction, the extent of satisfaction with relationships with parents, friends, and teachers did have a significant influence | Korean game addiction scale<br>Cronbach's alpha: >.80.                                  | A cross-sectional survey (n=1556)<br>Random sampling                     | High   |
| 61 | (Wu, Zhang, et al., 2016)<br>China   | To identify factors of internet addiction                                      | Literature review                             | Excessive, obsessive-compulsive, uncontrollable, tolerance-causing use of the internet, which causes significant distress and impairments in daily functioning | Parental control, per capita annual household income, academic performance, access to the internet, online activities related to internet addiction. Social support has a negative effect on internet addiction                                                                                                                                                                                                                                     | Young's online Internet Addiction Test (IAT). Reliability report from previous studies. | A cross-sectional study (n=10,574)<br>Stratified cluster random sampling | Medium |
| 62 | (Adiele & Olatokun, 2014)<br>Nigeria | To identify determinants of internet addiction among adolescents               | Literature review                             | Multiple constructs                                                                                                                                            | Extrinsic reason: using the internet to communicate on important matters, getting-sex oriented materials, and making money (especially amongst females). Intrinsic: the reason for going online                                                                                                                                                                                                                                                     | Young's online Internet Addiction Test (IAT). Reliability report from previous studies. | A cross-sectional survey (n=450)<br>Sampling: Not reported               | Medium |

## References

- Adiele, I., & Olatokun, W. (2014). Prevalence and determinants of Internet addiction among adolescents. *Computers in Human Behavior*, 31, 100-110.
- American Psychiatric Association. (2013). *Diagnostic and statistical manual of mental disorders* (5th ed.). Arlington, VA: American Psychiatric Association.
- Andreassen, C. S., Griffiths, M. D., Gjertsen, S. R., Krossbakken, E., Kvam, S., & Pallesen, S. (2013). The relationships between behavioral addictions and the five-factor model of personality. *Journal of behavioral addictions*, 2(2), 90-99.
- Ayas, T., Çakır, Ö., & Horzum, M. B. (2011). Ergenler için bilgisayar bağımlılığı ölçeği [Computer addiction Scale for Adolescence]. *Kastamonu Eğitim Dergisi*, 19(2), 439-448.
- Bekir, S., & Çelik, E. (2019). Examining the factors contributing to adolescents' online game addiction. *Anales De Psicologia/Annals of Psychology*, 35(3), 444-452.
- Bianchini, V., Cecilia, M. R., Roncone, R., & Cofini, V. (2017). Prevalence and factors associated with problematic internet use: An Italian survey among L'Aquila students. *Rivista di Psichiatria*, 52(2), 90-93.
- Billieux, J., Thorens, G., Khazaaal, Y., Zullino, D., Achab, S., & Van der Linden, M. (2015). Problematic involvement in online games: A cluster analytic approach. *Computers in Human Behavior*, 43, 242-250.
- Bonnaire, C., & Phan, O. (2017). Relationships between parental attitudes, family functioning and Internet gaming disorder in adolescents attending school. *Psychiatry Research*, 255, 104-110.
- Çakır, Ö., Ayas, T., & Horzum, M. B. (2011). An investigation of university students' internet and game addiction with respect to several variables. *Ankara University, Journal of Faculty of Educational Sciences*, 44(2), 95-117.
- Chang, F.-C., Chiu, C.-H., Lee, C.-M., Chen, P.-H., & Miao, N.-F. (2014). Predictors of the initiation and persistence of Internet addiction among adolescents in Taiwan. *Addictive Behaviors*, 39(10), 1434-1440.
- Charlton, J. P., & Danforth, I. D. W. (2007). Distinguishing addiction and high engagement in the context of online game playing. *Computers in Human Behavior*, 23(3), 1531-1548.
- Charoenwanit, S., & Sumneangsatorn, T. (2014). Predictors of game addiction in children and adolescents. *Thammasat Review*, 17(1), 150-166.
- Chen, S.-H., Weng, L.-J., Su, Y.-J., Wu, H.-M., & Yang, P.-F. (2003). Development of a Chinese Internet addiction scale and its psychometric study. *Chinese Journal of Psychology*.
- Chen, Y.-L., Chen, S.-H., & Gau, S. S.-F. (2015). ADHD and autistic traits, family function, parenting style, and social adjustment for Internet addiction among children and adolescents in Taiwan: A longitudinal study. *Research in Developmental Disabilities*, 39, 20-31.
- Choi, H. J., & Yoo, J. H. (2015). A study on the relationship between self-esteem, social support, smartphone dependency, internet game dependency of college students. *Journal of East-West Nursing Research*, 21(1), 78-84.
- Choo, H., Sim, T., Liau, A. K. F., Gentile, D. A., & Khoo, A. (2015). Parental influences on pathological symptoms of video-gaming among children and adolescents: A prospective study. *Journal of Child and Family Studies*, 24(5), 1429-1441.
- Dhir, A., Chen, S., & Nieminen, M. (2015). Predicting adolescent Internet addiction: The roles of demographics, technology accessibility, unwillingness to communicate and sought Internet gratifications. *Computers in Human Behavior*, 51, 24-33.
- Ding, Q., Li, D., Zhou, Y., Dong, H., & Luo, J. (2017). Perceived parental monitoring and adolescent internet addiction: A moderated mediation model. *Addictive Behaviors*, 74, 48-54.
- Dong, G., Wang, J., Yang, X., & Zhou, H. (2013). Risk personality traits of Internet addiction: A longitudinal study of Internet-addicted Chinese university students. *Asia-Pacific Psychiatry*, 5(4), 316-321.



- Frangos, C. C., Frangos, C. C., & Sotiropoulos, I. (2011). Problematic internet use among Greek university students: an ordinal logistic regression with risk factors of negative psychological beliefs, pornographic sites, and online games. *Cyberpsychology, Behavior, and Social Networking*, 14(1-2), 51-58.
- Fuster, H., Carbonell, X., Pontes, H. M., & Griffiths, M. D. (2016). Spanish validation of the internet gaming disorder-20 (IGD-20) test. *Computers in Human Behavior*, 56, 215-224.
- Gentile, D. (2009). Pathological video-game use among youth ages 8 to 18: A national study. *Psychological Science*, 20(5), 594-602.
- Griffiths, M. (2005). A "components" model of addiction within a biopsychosocial framework. *Journal of Substance Use*, 10(4), 191-197.
- Gunuc, S. (2017). Peer influence in internet and digital game addicted adolescents: Is internet/digital game addiction contagious? *International Journal of High Risk Behaviors and Addiction*, 6(2).
- Güntüç, S., & Kayrı, M. (2010). The profile of internet dependency in Turkey and development of internet addiction scale study of validity & reliability. *Hacettepe University Journal of Education*, 39.
- Horzum, M. B., Ayas, T., & Balta, Ö. Ç. (2016). Çocuklar için bilgisayar oyun bağımlılığı ölçeği [Computer gaming addiction scale for children]. *Türk Psikolojik Danışma ve Rehberlik Dergisi*, 3(30).
- Hu, J., Zhen, S., Yu, C., Zhang, Q., & Zhang, W. (2017). Sensation seeking and online gaming addiction in adolescents: A moderated mediation model of positive affective associations and impulsivity. *Frontiers in Psychology*, 8, 699.
- Hull, D. C., Williams, G. A., & Griffiths, M. D. (2013). Video game characteristics, happiness and flow as predictors of addiction among video game players: A pilot study. *Journal of Behavioral Addictions*, 2(3), 145-152.
- Hyun, G. J., Han, D. H., Lee, Y. S., Kang, K. D., Yoo, S. K., Chung, U.-S., & Renshaw, P. F. (2015). Risk factors associated with online game addiction: a hierarchical model. *Computers in Human Behavior*, 48, 706-713.
- Jeong, E. J., Lee, H. R., & Yoo, J. H. (2015). Addictive use due to personality: Focused on big five personality traits and game addiction. *International Journal of Social, Behavioral, Educational, Economic, Business and Industrial Engineering*, 9(6), 1995-1999.
- Karaca, S., Karakoc, A., Gurkan, O. C., Onan, N., & Barlas, G. U. (2020). Investigation of the online game addiction level, sociodemographic characteristics and social anxiety as risk factors for online game addiction in middle school students. *Community Mental Health Journal*, 1-9.
- Kaya, A. B. (2013). Çevrimiçi oyun bağımlılığı ölçeğinin geliştirilmesi: Geçerlik ve güvenilirlik çalışması [Development of online game addiction scale: validity and reliability study].
- Khazaal, Y., Billieux, J., Thorens, G., Khan, R., Louati, Y., Scarlatti, E., . . . Zullino, D. (2008). French validation of the internet addiction test. *Cyberpsychology & Behavior*, 11(6), 703-706.
- Kim, D., Lee, Y., Lee, J., Nam, J. K., & Chung, Y. (2014). Development of Korean smartphone addiction proneness scale for youth. *PLoS One*, 9(5), e97920.
- Kim, Y.-J., Roh, D., Lee, S.-K., Canan, F., & Potenza, M. N. (2018). Factors statistically predicting at-risk/problematic internet use in a sample of young adolescent boys and girls in South Korea. *Frontiers in Psychiatry*, 9, 351.
- Kim, Y.-Y., & Kim, M.-H. (2017). The impact of social factors on excessive online game usage, moderated by online self-identity. *Cluster Computing*, 20(1), 569-582.
- King, D. L., & Delfabbro, P. H. (2017). Features of parent-child relationships in adolescents with Internet Gaming Disorder. *International Journal of Mental Health and Addiction*, 15(6), 1270-1283.
- King, D. L., Zwaans, T., & Delfabbro, P. (2015). The influence of parenting practices on adolescent media use: A survey of Australian students. *Journal of Adolescence*, 9, 22-39.
- Király, O., Slezcka, P., Pontes, H. M., Urbán, R., Griffiths, M. D., & Demetrovics, Z. (2017). Validation of the ten-item Internet Gaming Disorder Test (IGDT-10) and evaluation of the nine DSM-5 Internet Gaming Disorder criteria. *Addictive Behaviors*, 64, 253-260.
- Kuss, D. J., Van Rooij, A. J., Shorter, G. W., Griffiths, M. D., & van de Mheen, D. (2013). Internet addiction in adolescents: Prevalence and risk factors. *Computers in Human Behavior*, 29(5), 1987-1996.
- Kwak, J. Y., Kim, J. Y., & Yoon, Y. W. (2018). Effect of parental neglect on smartphone addiction in adolescents in South Korea. *Child Abuse & Neglect*, 77, 75-84.
- Laconi, S., Pirès, S., & Chabrol, H. (2017). Internet gaming disorder, motives, game genres and psychopathology. *Computers in Human Behavior*, 75, 652-659.
- Lee, C., & Kim, O. (2017). Predictors of online game addiction among Korean adolescents. *Addiction Research & Theory*, 25(1), 58-66.
- Lee, H., Kim, J. W., & Choi, T. Y. (2017). Risk factors for smartphone addiction in Korean adolescents: Smartphone use patterns. *Journal of Korean Medical Science*, 32(10), 1674-1679.
- Lemmens, J. S., Valkenburg, P. M., & Gentile, D. A. (2015). The Internet gaming disorder scale. *Psychological Assessment*, 27(2), 567.
- Lemmens, J. S., Valkenburg, P. M., & Peter, J. (2009). Development and validation of a game addiction scale for adolescents. *Media Psychology*, 12(1), 77-95.
- Li, C., Dang, J., Zhang, X., Zhang, Q., & Guo, J. (2014). Internet addiction among Chinese adolescents: The effect of parental behavior and self-control. *Computers in Human Behavior*, 41, 1-7.
- Lim, Y., & Nam, S.-J. (2018). Exploring factors related to problematic internet use in childhood and adolescence. *International Journal of Mental Health and Addiction*, 1-13.
- Lin, M.-P., Ko, H.-C., & Wu, J. Y.-W. (2011). Prevalence and psychosocial risk factors associated with Internet addiction in a nationally representative sample of college students in Taiwan. *Cyberpsychology, Behavior, and Social Networking*, 14(12), 741-746.
- Meerkerk, G. J., Van Den Eijnden, R. J. J. M., Vermulst, A. A., & Garretsen, H. F. L. (2009). The compulsive internet use scale (CIUS): some psychometric properties. *Cyberpsychology & Behavior*, 12(1), 1-6.
- Mehroof, M., & Griffiths, M. D. (2010). Online gaming addiction: the role of sensation seeking, self-control, neuroticism, aggression, state anxiety, and trait anxiety. *Cyberpsychology, Behavior, and Social Networking*, 13(3), 313-316.
- Milani, L., La Torre, G., Fiore, M., Grumi, S., Gentile, D. A., Ferrante, M., . . . Di Blasio, P. (2018). Internet gaming addiction in adolescence: Risk factors and maladjustment correlates. *International Journal of Mental Health and Addiction*, 16(4), 888-904.
- Moslehpour, M., & Batjargal, U. (2013). Factors influencing internet addiction among adolescents of Malaysia and Mongolia. *Jurnal Administrasi Bisnis*, 9(2).
- Müller, K. W., Janikian, M., Dreier, M., Wöfling, K., Beutel, M. E., Tzavara, C., . . . Tsitsika, A. (2015). Regular gaming behavior and internet gaming disorder in European adolescents: Results from a cross-national representative survey of prevalence, predictors, and psychopathological correlates. *European Child & Adolescent Psychiatry*, 24(5), 565-574.
- Pawłowska, B., Potembska, E., & Szymańska, J. (2018). Demographic and family-related predictors of online gaming addiction in adolescents. *Polish Journal of Public Health*, 128(1), 9-13.
- Peeters, M., Koning, I., & van den Eijnden, R. (2018). Predicting Internet gaming disorder symptoms in young adolescents: A one-year follow-up study. *Computers in Human Behavior*, 80, 255-261.
- Porter, G., Starcevic, V., Berle, D., & Fenech, P. (2010). Recognizing problem video game use. *Australian and New Zealand Journal of Psychiatry*, 44(2), 120-128.
- Potembska, E., & Pawłowska, B. (2014). Właściwości psychometryczne Kwestionariusza do Badania Uzależnienia od Gier Internetowych (KBUGI). *Current Problems of Psychiatry*, 15(3), 135-143.
- Rehbein, F., Psych, G., Kleimann, M., Mediasci, G., & Mößle, T. (2010). Prevalence and risk factors of video game dependency in adolescence: Results of a German nationwide survey. *Cyberpsychology, Behavior, and Social Networking*, 13(3), 269-277.
- Rho, M. J., Jeong, J.-E., Chun, J.-W., Cho, H., Jung, D. J., Choi, I. Y., & Kim, D.-J. (2016). Predictors and patterns of problematic Internet game use using a decision tree model. *Journal of Behavioral Addictions*, 5(3), 500-509.
- Samarein, Z. A., Far, N. S., Yekleh, M., Tahmasebi, S., Yaryari, F., Ramezani, V., & Sandi, L. (2013). Relationship between personality traits and internet addiction of students at Kharazmi University. *International Journal of Psychology and Behavioral Research*, 2(1), 10-17.
- Shek, D. T. L., Tang, V. M. Y., & Lo, C. Y. (2008). Internet addiction in Chinese adolescents in Hong Kong: Assessment, profiles, and psychosocial correlates. *The Scientific World Journal*, 8, 776-787.
- Shek, D. T. L., & Yu, L. (2016). Adolescent internet addiction in Hong Kong: prevalence, change, and correlates. *Journal of Pediatric and Adolescent Gynecology*, 29(1), S22-S30.
- Smith, L. J., Gradisar, M., & King, D. L. (2015). Parental influences on adolescent video game play: A study of accessibility, rules, limit setting, monitoring, and cybersafety. *Cyberpsychology, Behavior, and Social Networking*, 18(5), 273-279.
- Spilkova, J., Chomynova, P., & Csemy, L. (2017). Predictors of excessive use of social media and excessive online gaming in Czech teenagers. *Journal of Behavioral Addictions*, 6(4), 611-619.
- Stavropoulos, V., Kuss, D., Griffiths, M., & Motti-Stefanidi, F. (2016). A longitudinal study of adolescent internet addiction: The role of conscientiousness and classroom hostility. *Journal of Adolescent Research*, 31(4), 442-473.
- Sul, S. (2015). Determinants of internet game addiction and therapeutic role of family leisure participation. *Journal of Inclusion Phenomena and Macrocyclic Chemistry*, 82(1-2), 271-278.
- Sun, Y., Zhao, Y., Jia, S.-Q., & Zheng, D.-Y. (2015, 2015). *Understanding the antecedents of mobile game addiction: The roles of perceived visibility, perceived enjoyment and flow*. Paper presented at the Pacific Asia Conference on Information Systems (PACIS)
- Tian, Y., Yu, C., Lin, S., Lu, J., Liu, Y., & Zhang, W. (2019). Sensation seeking, deviant peer affiliation, and Internet gaming addiction among Chinese adolescents: The moderating effect of parental knowledge. *Frontiers in Psychology*, 9, 2727.
- Toker, S., & Baturay, M. H. (2016). Antecedents and consequences of game addiction. *Computers in human behavior*, 55, 668-679.
- Torres-Rodriguez, A., Griffiths, M. D., Carbonell, X., & Oberst, U. (2018). Internet gaming disorder in adolescence: Psychological characteristics of a clinical sample. *Journal of Behavioral Addictions*, 7(3), 707-718.
- Tsitsika, A., Janikian, M., Schoenmakers, T. M., Tzavela, E. C., Olafsson, K., Wójcik, S., . . . Richardson, C. (2014). Internet addictive behavior in adolescence: A cross-sectional study in seven European countries. *Cyberpsychology, Behavior, and Social Networking*, 17(8), 528-535.
- Vollmer, C., Randler, C., Horzum, M. B., & Ayas, T. (2014). Computer game addiction in adolescents and its relationship to chronotype and personality. *Sage Open*, 4(1), 2158244013518054.
- Vukosavljevic-Gvozden, T., Filipovic, S., & Opacic, G. (2015). The mediating role of symptoms of psychopathology between irrational beliefs and internet gaming addiction. *Journal of Rational-Emotive & Cognitive-Behavior Therapy*, 33(4), 387-405.
- Walther, B., Morgenstern, M., & Hanewinkel, R. (2012). Co-occurrence of addictive behaviours: Personality factors related to substance use, gambling and computer gaming. *European Addiction Research*, 18(4), 167-174.
- Wang, C.-W., Chan, C. L. W., Mak, K.-K., Ho, S.-Y., Wong, P. W. C., & Ho, R. T. H. (2014). Prevalence and correlates of video and Internet gaming addiction among Hong Kong adolescents: A pilot study. *The Scientific World Journal*, 2014.
- Witek, C. T., Finseras, T. R., Pallesen, S., Mentzoni, R. A., Hanss, D., Griffiths, M. D., & Molde, H. (2016). Prevalence and predictors of video game addiction: A study based on a national representative sample of gamers. *International Journal of Mental Health and Addiction*, 14(5), 672-686.
- Wöfling, K., Mueller, K. W., & Beutel, M. (2011). Reliability and validity of the Scale for the Assessment of Pathological Computer-Gaming (CSV-S). *Psychotherapie, Psychosomatik, Medizinische Psychologie*, 61(5), 216-224.
- Wong, I. L. K., & Lam, M. P. S. (2016). Gaming behavior and addiction among Hong Kong adolescents. *Asian Journal of Gambling Issues and Public Health*, 6(1), 6.
- Wu, J. Y. W., Ko, H.-C., Wong, T.-Y., Wu, L.-A., & Oei, T. P. (2016). Positive outcome expectancy mediates the relationship between peer influence and Internet gaming addiction among adolescents in Taiwan. *Cyberpsychology, Behavior, and Social Networking*, 19(1), 49-55.
- Wu, X.-S., Zhang, Z.-H., Zhao, F., Wang, W.-J., Li, Y.-F., Bi, L., . . . Hu, C.-Y. (2016). Prevalence of Internet addiction and its association with social support and other related factors among adolescents in China. *Journal of Adolescence*, 52, 103-111.
- Xu, Z., Turel, O., & Yuan, Y. (2012). Online game addiction among adolescents: motivation and prevention factors. *European Journal of Information Systems*, 21(3), 321-340.
- Young, K. S. (1998). Internet addiction: The emergence of a new clinical disorder. *Cyberpsychology & Behavior*, 1(3), 237-244.
- Yu, C., Li, X., & Zhang, W. (2015). Predicting adolescent problematic online game use from teacher autonomy support, basic psychological needs satisfaction, and school engagement: A 2-year longitudinal study. *Cyberpsychology, Behavior, and Social Networking*, 18(4), 228-233.
